# Supplementary material
Source: MDPI journal article supplement (https://www.mdpi.com/2312-7481/6/4/55)
Supplement: s1 [file s1]

No syntax errors found.  
Please wait while processing ....

[CIF dictionary](#)  
[Interpreting this report](#)

## Datablock: fe4ch2sac\_8\_work3

|                        |                                                      |                               |
|------------------------|------------------------------------------------------|-------------------------------|
| Bond precision:        | C-C = 0.0057 Å                                       | Wavelength=0.71073            |
| Cell:                  | a=15.9287(6)    b=24.8996(11)    c=26.7398(12)       |                               |
|                        | alpha=68.529(2)    beta=77.634(2)    gamma=81.590(2) |                               |
| Temperature:           | 120 K                                                |                               |
|                        | Calculated                                           | Reported                      |
| Volume                 | 9613.6(7)                                            | 9613.6(7)                     |
| Space group            | P -1                                                 | P-1                           |
| Hall group             | -P 1                                                 | -P 1                          |
| Moiety formula         | C80 H136 Fe4 O20 S2, C4 H10 O                        | C80 H136 Fe4 O20 S2, C4 H10 O |
| Sum formula            | C84 H146 Fe4 O21 S2                                  | C84 H146 Fe4 O21 S2           |
| Mr                     | 1779.53                                              | 1779.53                       |
| Dx, g cm <sup>-3</sup> | 1.230                                                | 1.229                         |
| Z                      | 4                                                    | 4                             |
| Mu (mm <sup>-1</sup> ) | 0.697                                                | 0.697                         |
| F000                   | 3816.0                                               | 3816.0                        |
| F000'                  | 3824.06                                              |                               |
| h, k, lmax             | 19, 30, 33                                           | 19, 30, 33                    |
| Nref                   | 38523                                                | 38056                         |
| Tmin, Tmax             | 0.703, 0.846                                         | 0.713, 0.850                  |
| Tmin'                  | 0.689                                                |                               |
| Correction method=     | # Reported T Limits: Tmin=0.713                      |                               |
| Tmax=0.850 AbsCorr =   | MULTI-SCAN                                           |                               |
| Data completeness=     | 0.988    Theta(max)= 26.180                          |                               |
| R(reflections)=        | 0.0505( 26267)    wR2(reflections)= 0.1455( 38056)   |                               |
| S =                    | 1.012    Npar= 2054                                  |                               |

The following ALERTS were generated. Each ALERT has the format  
**test-name\_ALERT\_alert-type\_alert-level**.  
Click on the hyperlinks for more details of the test.

### Alert level B

[PLAT201\\_ALERT\\_2\\_B](#) Isotropic non-H Atoms in Main Residue(s) ..... 3 Report  
O41                    C161                    C162

**Author Response: Isotropic refinement was found preferable for the extensively overlapping acetyl moieties of disordered thioacetyl group in MOL2 (O40,C159,C160,O41,C161,C162)**

[PLAT213\\_ALERT\\_2\\_B](#) Atom C112                    has ADP max/min Ratio ..... 4.3 prolat

**Author Response: Methyl C atoms of tBu groups undergoing rotational disorder**

[PLAT213\\_ALERT\\_2\\_B](#) Atom C44                    has ADP max/min Ratio ..... 4.1 prolat

**Author Response: Methyl C atoms of tBu groups undergoing rotational disorder**

[PLAT220\\_ALERT\\_2\\_B](#) NonSolvent    Resd 1    C    Ueq(max)/Ueq(min) Range    6.1 Ratio

**Author Response: Larger than usual Ueq values are associated with some methyl C atoms of tBu groups, which undergo rotational disorder, and to C and O atoms of thioacetyl groups**

[PLAT220\\_ALERT\\_2\\_B](#) NonSolvent    Resd 2    C    Ueq(max)/Ueq(min) Range    7.6 Ratio

**Author Response: Larger than usual Ueq values are associated with some methyl C atoms of tBu groups, which undergo rotational disorder, and to C and O atoms of thioacetyl groups**

[PLAT242\\_ALERT\\_2\\_B](#) Low            'MainMol' Ueq as Compared to Neighbors of    C109 Check

**Author Response: Quaternary C atoms of tBu groups, whose methyl C atoms have much larger Ueq values due to rotational disorder**

[PLAT242\\_ALERT\\_2\\_B](#) Low            'MainMol' Ueq as Compared to Neighbors of    C41 Check

**Author Response: Quaternary C atoms of tBu groups, whose methyl C atoms have much larger Ueq values due to rotational disorder**

**Alert level C**

[DIFMX02\\_ALERT\\_1\\_C](#) The maximum difference density is > 0.1\*ZMAX\*0.75  
The relevant atom site should be identified.

[PLAT094\\_ALERT\\_2\\_C](#) Ratio of Maximum / Minimum Residual Density .... 3.05 Report

[PLAT097\\_ALERT\\_2\\_C](#) Large Reported Max. (Positive) Residual Density 2.23 eA-3

[PLAT202\\_ALERT\\_3\\_C](#) Isotropic non-H Atoms in Anion/Solvent ..... 5 Check  
Ox2A Cx6A Cx5A Cx7A Cx8A

[PLAT213\\_ALERT\\_2\\_C](#) Atom C110 has ADP max/min Ratio ..... 3.1 prolat

**Author Response: Methyl C atoms of tBu groups undergoing rotational disorder**

[PLAT213\\_ALERT\\_2\\_C](#) Atom C30A has ADP max/min Ratio ..... 3.1 prolat

**Author Response: Methyl C atoms of tBu groups undergoing rotational disorder**

[PLAT213\\_ALERT\\_2\\_C](#) Atom C43 has ADP max/min Ratio ..... 3.6 prolat

**Author Response: Methyl C atoms of tBu groups undergoing rotational disorder**

[PLAT213\\_ALERT\\_2\\_C](#) Atom C47 has ADP max/min Ratio ..... 3.2 prolat

**Author Response: Methyl C atoms of tBu groups undergoing rotational disorder**

[PLAT220\\_ALERT\\_2\\_C](#) NonSolvent Resd 1 0 Ueq(max)/Ueq(min) Range 3.7 Ratio

**Author Response: Larger than usual Ueq values are associated with some methyl C atoms of tBu groups, which undergo rotational disorder, and to C and O atoms of thioacetyl groups**

[PLAT220\\_ALERT\\_2\\_C](#) NonSolvent Resd 2 0 Ueq(max)/Ueq(min) Range 4.4 Ratio

**Author Response: Larger than usual Ueq values are associated with some methyl C atoms of tBu groups, which undergo rotational disorder, and to C and O atoms of thioacetyl groups**

[PLAT222\\_ALERT\\_3\\_C](#) NonSolvent Resd 1 H Uiso(max)/Uiso(min) Range 7.1 Ratio

[PLAT222\\_ALERT\\_3\\_C](#) NonSolvent Resd 2 H Uiso(max)/Uiso(min) Range 8.3 Ratio

[PLAT242\\_ALERT\\_2\\_C](#) Low 'MainMol' Ueq as Compared to Neighbors of C125 Check

**Author Response: Quaternary C atoms of tBu groups, whose methyl C atoms have much larger Ueq values due to rotational disorder**

[PLAT242\\_ALERT\\_2\\_C](#) Low 'MainMol' Ueq as Compared to Neighbors of C133 Check

**Author Response: Quaternary C atoms of tBu groups, whose methyl C atoms have much larger Ueq values due to rotational disorder**

[PLAT242\\_ALERT\\_2\\_C](#) Low 'MainMol' Ueq as Compared to Neighbors of C141 Check

**Author Response: Quaternary C atoms of tBu groups, whose methyl C atoms have much larger Ueq values due to rotational disorder**

[PLAT242\\_ALERT\\_2\\_C](#) Low 'MainMol' Ueq as Compared to Neighbors of C29 Check

**Author Response: Quaternary C atoms of tBu groups, whose methyl C atoms have much larger Ueq values due to rotational disorder**

[PLAT242\\_ALERT\\_2\\_C](#) Low 'MainMol' Ueq as Compared to Neighbors of C45 Check

**Author Response: Quaternary C atoms of tBu groups, whose methyl C atoms have much larger Ueq values due to rotational disorder**

[PLAT242\\_ALERT\\_2\\_C](#) Low 'MainMol' Ueq as Compared to Neighbors of C53 Check

**Author Response: Quaternary C atoms of tBu groups, whose methyl C atoms have much larger Ueq values due to rotational disorder**

[PLAT242\\_ALERT\\_2\\_C](#) Low 'MainMol' Ueq as Compared to Neighbors of C61 Check

**Author Response: Quaternary C atoms of tBu groups, whose methyl C atoms have much larger Ueq values due to rotational disorder**

[PLAT242\\_ALERT\\_2\\_C](#) Low 'MainMol' Ueq as Compared to Neighbors of C65 Check

**Author Response: Quaternary C atoms of tBu groups, whose methyl C atoms have much larger Ueq values due to rotational disorder**

[PLAT242 ALERT 2 C](#) Low 'MainMol' Ueq as Compared to Neighbors of C75 Check

**Author Response: Quaternary C atoms of tBu groups, whose methyl C atoms have much larger Ueq values due to rotational disorder**

[PLAT243 ALERT 4 C](#) High 'Solvent' Ueq as Compared to Neighbors of Ox1 Check  
[PLAT244 ALERT 4 C](#) Low 'Solvent' Ueq as Compared to Neighbors of Cx1 Check  
[PLAT244 ALERT 4 C](#) Low 'Solvent' Ueq as Compared to Neighbors of Cx3 Check  
[PLAT260 ALERT 2 C](#) Large Average Ueq of Residue Including Ox1 0.137 Check  
[PLAT360 ALERT 2 C](#) Short C(sp3)-C(sp3) Bond C41 - C44 . 1.43 Ang.

**And 2 other PLAT360 Alerts**

[PLAT360 ALERT 2 C](#) Short C(sp3)-C(sp3) Bond Cx2 - Cx1 . 1.40 Ang.  
[PLAT360 ALERT 2 C](#) Short C(sp3)-C(sp3) Bond Cx3 - Cx4 . 1.39 Ang.

**Alert level G**

[PLAT002 ALERT 2 G](#) Number of Distance or Angle Restraints on AtSite 57 Note  
[PLAT005 ALERT 5 G](#) No Embedded Refinement Details Found in the CIF Please Do !  
[PLAT083 ALERT 2 G](#) SHELXL Second Parameter in WGHT Unusually Large 14.27 Why ?  
[PLAT154 ALERT 1 G](#) The s.u.'s on the Cell Angles are Equal ..(Note) 0.002 Degree  
[PLAT301 ALERT 3 G](#) Main Residue Disorder .....(Resd 1 ) 12% Note  
[PLAT301 ALERT 3 G](#) Main Residue Disorder .....(Resd 2 ) 8% Note  
[PLAT302 ALERT 4 G](#) Anion/Solvent/Minor-Residue Disorder (Resd 4 ) 100% Note  
[PLAT302 ALERT 4 G](#) Anion/Solvent/Minor-Residue Disorder (Resd 5 ) 100% Note  
[PLAT304 ALERT 4 G](#) Non-Integer Number of Atoms in ..... (Resd 4 ) 8.27 Check  
[PLAT304 ALERT 4 G](#) Non-Integer Number of Atoms in ..... (Resd 5 ) 6.73 Check  
[PLAT380 ALERT 4 G](#) Incorrectly? Oriented X(sp2)-Methyl Moiety ..... C156 Check

**And 2 other PLAT380 Alerts**

[PLAT380 ALERT 4 G](#) Incorrectly? Oriented X(sp2)-Methyl Moiety ..... C76 Check  
[PLAT380 ALERT 4 G](#) Incorrectly? Oriented X(sp2)-Methyl Moiety ..... C80 Check

[PLAT412 ALERT 2 G](#) Short Intra XH3 .. XHn H91 ..Hy3G . 2.01 Ang.  
 x,y,z = 1\_555 Check  
[PLAT412 ALERT 2 G](#) Short Intra XH3 .. XHn H103 ..Hy9H . 2.12 Ang.  
 x,y,z = 1\_555 Check  
[PLAT412 ALERT 2 G](#) Short Intra XH3 .. XHn H11 ..H39A . 2.05 Ang.  
 x,y,z = 1\_555 Check  
[PLAT412 ALERT 2 G](#) Short Intra XH3 .. XHn H11 ..Hx2G . 2.02 Ang.  
 x,y,z = 1\_555 Check  
[PLAT413 ALERT 2 G](#) Short Inter XH3 .. XHn Hy8J ..Hx1B . 2.12 Ang.  
 1-x,1-y,1-z = 2\_666 Check  
[PLAT432 ALERT 2 G](#) Short Inter X...Y Contact C126 ..Cx14 . 3.11 Ang.  
 -1+x,y,z = 1\_455 Check  
[PLAT432 ALERT 2 G](#) Short Inter X...Y Contact C155 ..Cx22 . 3.13 Ang.  
 x,y,z = 1\_555 Check  
[PLAT720 ALERT 4 G](#) Number of Unusual/Non-Standard Labels ..... 214 Note  
[PLAT773 ALERT 2 G](#) Check long C-C Bond in CIF: C69 --Cx18 1.74 Ang.  
[PLAT773 ALERT 2 G](#) Check long C-C Bond in CIF: C133 --C163 1.71 Ang.  
[PLAT774 ALERT 1 G](#) Check X-Y Bond in CIF: Fe2 --Fe3 .. 5.35 Ang.

**And 5 other PLAT774 Alerts**

[PLAT774 ALERT 1 G](#) Check X-Y Bond in CIF: Fe2 --Fe4 .. 5.36 Ang.  
[PLAT774 ALERT 1 G](#) Check X-Y Bond in CIF: Fe3 --Fe4 .. 5.31 Ang.  
[PLAT774 ALERT 1 G](#) Check X-Y Bond in CIF: Fe6 --Fe7 .. 5.37 Ang.  
[PLAT774 ALERT 1 G](#) Check X-Y Bond in CIF: Fe6 --Fe8 .. 5.43 Ang.  
[PLAT774 ALERT 1 G](#) Check X-Y Bond in CIF: Fe7 --Fe8 .. 5.29 Ang.

[PLAT779 ALERT 4 G](#) Suspect or Irrelevant (Bond) Angle(s) in CIF . # 162 Check  
 C31A -C29 -C31B 1.555 1.555 1.555 38.60 Deg.  
[PLAT779 ALERT 4 G](#) Suspect or Irrelevant (Bond) Angle(s) in CIF . # 168 Check  
 C32A -C29 -C32B 1.555 1.555 1.555 42.10 Deg.  
[PLAT779 ALERT 4 G](#) Suspect or Irrelevant (Bond) Angle(s) in CIF . # 172 Check  
 C30A -C29 -C30B 1.555 1.555 1.555 42.50 Deg.  
[PLAT779 ALERT 4 G](#) Suspect or Irrelevant (Bond) Angle(s) in CIF . # 191 Check  
 C39 -C37 -CX24 1.555 1.555 1.555 38.00 Deg.  
[PLAT779 ALERT 4 G](#) Suspect or Irrelevant (Bond) Angle(s) in CIF . # 248 Check  
 CX20 -C69 -C72 1.555 1.555 1.555 42.60 Deg.  
[PLAT779 ALERT 4 G](#) Suspect or Irrelevant (Bond) Angle(s) in CIF . # 450 Check  
 C118 -C117 -CX16 1.555 1.555 1.555 39.40 Deg.  
[PLAT779 ALERT 4 G](#) Suspect or Irrelevant (Bond) Angle(s) in CIF . # 486 Check  
 C165 -C133 -C134 1.555 1.555 1.555 43.70 Deg.  
[PLAT779 ALERT 4 G](#) Suspect or Irrelevant (Bond) Angle(s) in CIF . # 527 Check  
 CX12 -C149 -C152 1.555 1.555 1.555 39.40 Deg.  
[PLAT794 ALERT 5 G](#) Tentative Bond Valency for Fe1 (III) . 3.27 Info

**And 7 other PLAT794 Alerts**

|                         |                       |                   |                   |                                                 |       |   |      |      |
|-------------------------|-----------------------|-------------------|-------------------|-------------------------------------------------|-------|---|------|------|
| <a href="#">PLAT794</a> | <a href="#">ALERT</a> | <a href="#">5</a> | <a href="#">G</a> | Tentative Bond Valency for Fe2                  | (III) | . | 3.18 | Info |
| <a href="#">PLAT794</a> | <a href="#">ALERT</a> | <a href="#">5</a> | <a href="#">G</a> | Tentative Bond Valency for Fe3                  | (III) | . | 3.18 | Info |
| <a href="#">PLAT794</a> | <a href="#">ALERT</a> | <a href="#">5</a> | <a href="#">G</a> | Tentative Bond Valency for Fe4                  | (III) | . | 3.19 | Info |
| <a href="#">PLAT794</a> | <a href="#">ALERT</a> | <a href="#">5</a> | <a href="#">G</a> | Tentative Bond Valency for Fe5                  | (III) | . | 3.27 | Info |
| <a href="#">PLAT794</a> | <a href="#">ALERT</a> | <a href="#">5</a> | <a href="#">G</a> | Tentative Bond Valency for Fe6                  | (III) | . | 3.18 | Info |
| <a href="#">PLAT794</a> | <a href="#">ALERT</a> | <a href="#">5</a> | <a href="#">G</a> | Tentative Bond Valency for Fe7                  | (III) | . | 3.17 | Info |
| <a href="#">PLAT794</a> | <a href="#">ALERT</a> | <a href="#">5</a> | <a href="#">G</a> | Tentative Bond Valency for Fe8                  | (III) | . | 3.19 | Info |
| <hr/>                   |                       |                   |                   |                                                 |       |   |      |      |
| <a href="#">PLAT860</a> | <a href="#">ALERT</a> | <a href="#">3</a> | <a href="#">G</a> | Number of Least-Squares Restraints .....        |       |   | 50   | Note |
| <a href="#">PLAT899</a> | <a href="#">ALERT</a> | <a href="#">4</a> | <a href="#">G</a> | SHELXL97 is Deprecated and Succeeded by SHELXL/ |       |   | 2018 | Note |

0 **ALERT level A** = Most likely a serious problem - resolve or explain  
 7 **ALERT level B** = A potentially serious problem, consider carefully  
 28 **ALERT level C** = Check. Ensure it is not caused by an omission or oversight  
 47 **ALERT level G** = General information/check it is not something unexpected

8 ALERT type 1 CIF construction/syntax error, inconsistent or missing data  
 39 ALERT type 2 Indicator that the structure model may be wrong or deficient  
 6 ALERT type 3 Indicator that the structure quality may be low  
 20 ALERT type 4 Improvement, methodology, query or suggestion  
 9 ALERT type 5 Informative message, check

It is advisable to attempt to resolve as many as possible of the alerts in all categories. Often the minor alerts point to easily fixed oversights, errors and omissions in your CIF or refinement strategy, so attention to these fine details can be worthwhile. In order to resolve some of the more serious problems it may be necessary to carry out additional measurements or structure refinements. However, the purpose of your study may justify the reported deviations and the more serious of these should normally be commented upon in the discussion or experimental section of a paper or in the "special\_details" fields of the CIF. checkCIF was carefully designed to identify outliers and unusual parameters, but every test has its limitations and alerts that are not important in a particular case may appear. Conversely, the absence of alerts does not guarantee there are no aspects of the results needing attention. It is up to the individual to critically assess their own results and, if necessary, seek expert advice.

### Publication of your CIF in IUCr journals

A basic structural check has been run on your CIF. These basic checks will be run on all CIFs submitted for publication in IUCr journals (*Acta Crystallographica*, *Journal of Applied Crystallography*, *Journal of Synchrotron Radiation*); however, if you intend to submit to *Acta Crystallographica Section C* or *E* or *IUCrData*, you should make sure that [full publication checks](#) are run on the final version of your CIF prior to submission.

### Publication of your CIF in other journals

Please refer to the *Notes for Authors* of the relevant journal for any special instructions relating to CIF submission.

---

PLATON version of 18/09/2020; check.def file version of 20/08/2020

**Datablock fe4ch2sac\_8\_work3 - ellipsoid plot**

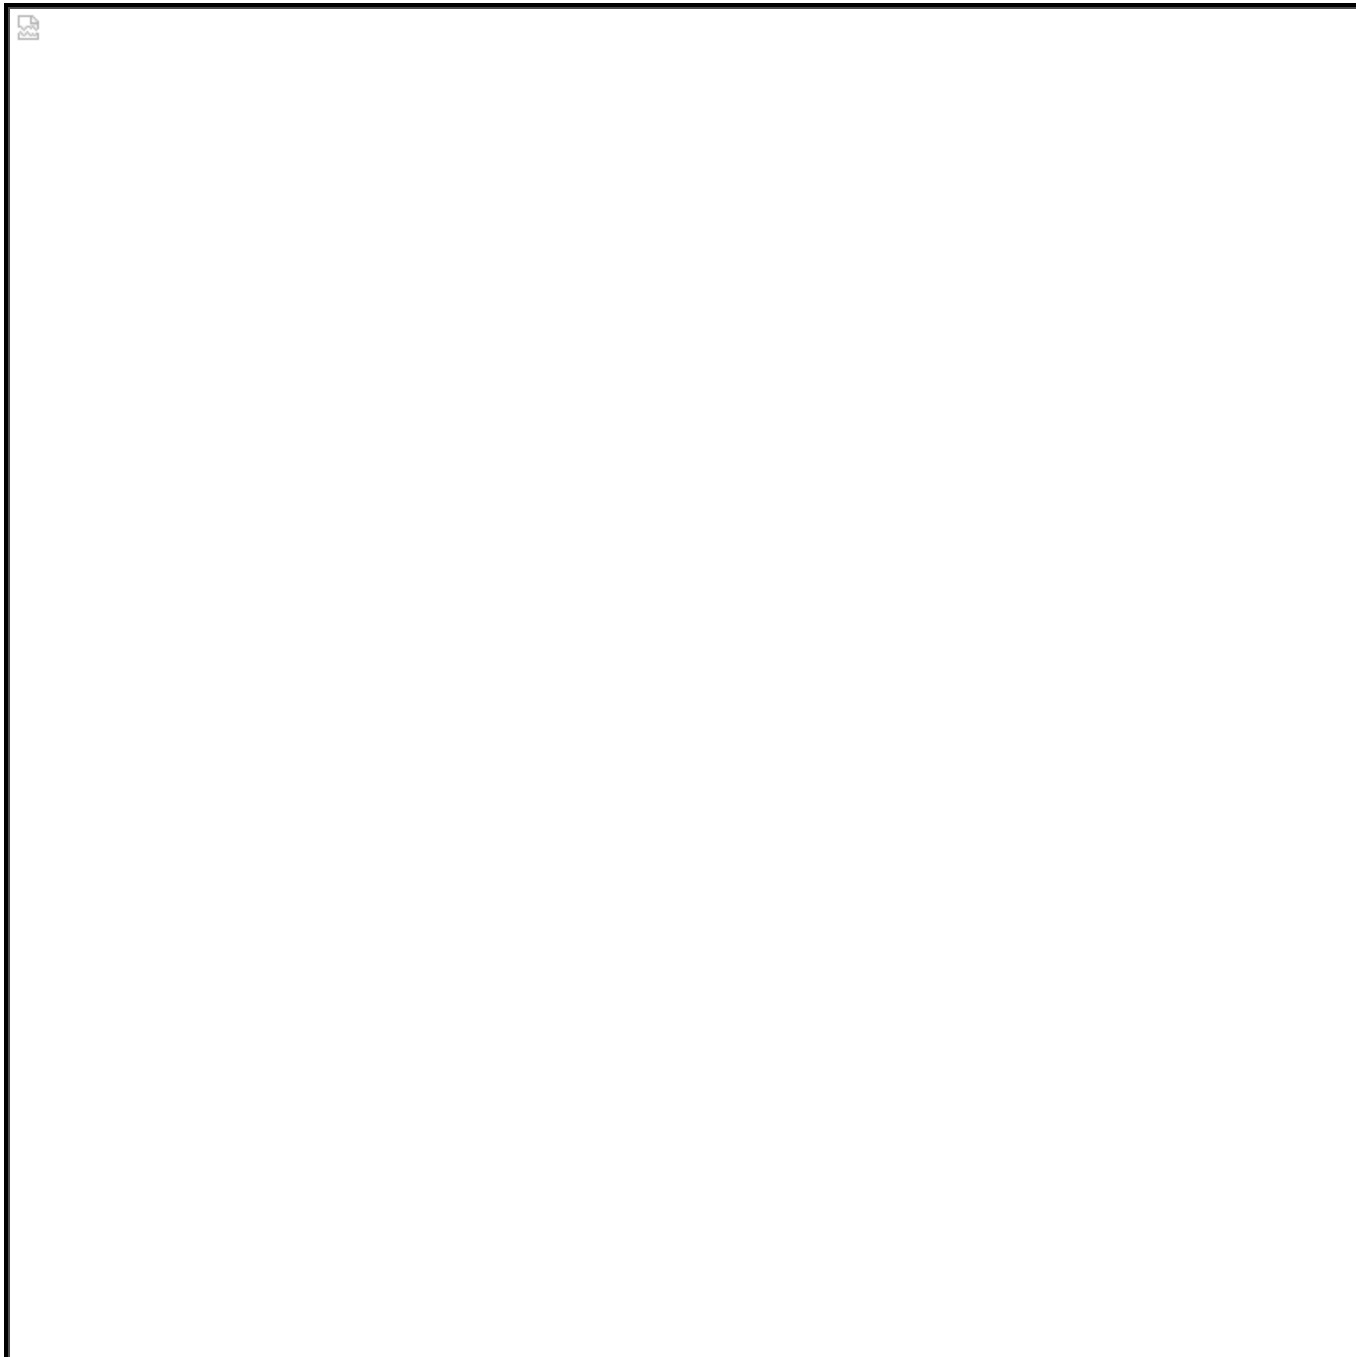

---

[Download CIF editor \(publCIF\) from the IUCr](#)  
[Download CIF editor \(enCIFer\) from the CCDC](#)  
[Test a new CIF entry](#)
