# Supplementary material
Source: MDPI journal article supplement (https://www.mdpi.com/2312-7481/6/4/55)
Supplement: s1 [file s1]

Archive with 5 entries (5 files):
- checkCIF_PLATON report_compound_3.pdf
- checkCIF_PLATON report_compound_1.pdf
- checkCIF_PLATON report_compound_2(0.375)Et2O.pdf
- checkCIF_PLATON report_compound_2Et2O.pdf
- Supplementary Materials 15092020_nofields-R2.pdf
