# Supplementary material
Source: MDPI journal article supplement (https://www.mdpi.com/2312-7481/6/4/55)
Supplement: s1 [file s1 › checkCIF_PLATON report_compound_1.pdf]

No syntax errors found.  
Please wait while processing ....

[CIF dictionary](#)  
[Interpreting this report](#)

## Datablock: Fe4SCN\_2\_work4

Bond precision: C-C = 0.0037 Å Wavelength=0.71073  
Cell: a=27.8089(12) b=17.3432(8) c=20.7771(8)  
alpha=90 beta=117.3181(14) gamma=90  
Temperature: 120 K

|                        | Calculated             | Reported               |
|------------------------|------------------------|------------------------|
| Volume                 | 8903.1(7)              | 8903.1(7)              |
| Space group            | C 2/c                  | C 2/c                  |
| Hall group             | -C 2yc                 | -C 2yc                 |
| Moiety formula         | C78 H130 Fe4 N2 O18 S2 | C78 H130 Fe4 N2 O18 S2 |
| Sum formula            | C78 H130 Fe4 N2 O18 S2 | C78 H130 Fe4 N2 O18 S2 |
| Mr                     | 1671.36                | 1671.35                |
| Dx, g cm <sup>-3</sup> | 1.247                  | 1.247                  |
| Z                      | 4                      | 4                      |
| Mu (mm <sup>-1</sup> ) | 0.747                  | 0.747                  |
| F000                   | 3568.0                 | 3568.0                 |
| F000'                  | 3575.90                |                        |
| h, k, lmax             | 36, 22, 27             | 36, 22, 27             |
| Nref                   | 10803                  | 10747                  |
| Tmin, Tmax             | 0.675, 0.770           | 0.603, 0.780           |
| Tmin'                  | 0.632                  |                        |

Correction method= # Reported T Limits: Tmin=0.603  
Tmax=0.780 AbsCorr = MULTI-SCAN  
Data completeness= 0.995 Theta(max)= 28.043  
R(reflections)= 0.0438 ( 8194) wR2(reflections)= 0.1352 ( 10747)  
S = 1.069 Npar= 501

The following ALERTS were generated. Each ALERT has the format  
**test-name\_ALERT\_alert-type\_alert-level**.  
Click on the hyperlinks for more details of the test.

### Alert level B

[PLAT910\\_ALERT\\_3\\_B](#) Missing # of FCF Reflection(s) Below Theta(Min). 19 Note

**Author Response: Low-order reflections (partly) obscured by the beam stopper and rejected as outliers by SADABS or deliberately omitted from the final least-squares refinement based on Iobs << Icalc.**

### Alert level C

[PLAT094\\_ALERT\\_2\\_C](#) Ratio of Maximum / Minimum Residual Density .... 2.22 Report  
[PLAT220\\_ALERT\\_2\\_C](#) NonSolvent Resd 1 C Ueq(max)/Ueq(min) Range 3.7 Ratio  
[PLAT222\\_ALERT\\_3\\_C](#) NonSolvent Resd 1 H Uiso(max)/Uiso(min) Range 4.5 Ratio  
[PLAT242\\_ALERT\\_2\\_C](#) Low 'MainMol' Ueq as Compared to Neighbors of C26 Check  
[PLAT242\\_ALERT\\_2\\_C](#) Low 'MainMol' Ueq as Compared to Neighbors of C30 Check  
[PLAT911\\_ALERT\\_3\\_C](#) Missing FCF Refl Between Thmin & STh/L= 0.600 8 Report  
[PLAT922\\_ALERT\\_1\\_C](#) wR2 in the CIF and FCF Differ by ..... 0.0012 Check

### Alert level G

[PLAT002\\_ALERT\\_2\\_G](#) Number of Distance or Angle Restraints on AtSite 8 Note  
[PLAT003\\_ALERT\\_2\\_G](#) Number of Uiso or Uij Restrained non-H Atoms ... 8 Report  
[PLAT083\\_ALERT\\_2\\_G](#) SHELXL Second Parameter in WGHT Unusually Large 6.38 Why ?  
[PLAT128\\_ALERT\\_4\\_G](#) Alternate Setting for Input Space Group C2/c I2/a Note  
[PLAT171\\_ALERT\\_4\\_G](#) The CIF-Embedded .res File Contains EADP Records 1 Report  
[PLAT175\\_ALERT\\_4\\_G](#) The CIF-Embedded .res File Contains SAME Records 1 Report  
[PLAT187\\_ALERT\\_4\\_G](#) The CIF-Embedded .res File Contains RIGU Records 2 Report  
[PLAT230\\_ALERT\\_2\\_G](#) Hirshfeld Test Diff for S1 --C39 . 7.3 s.u.  
[PLAT301\\_ALERT\\_3\\_G](#) Main Residue Disorder .....(Resd 1 ) 8% Note  
[PLAT412\\_ALERT\\_2\\_G](#) Short Intra XH3 .. XHn H6 ..H15C . 2.11 Ang.  
x, y, z = 1\_555 Check  
[PLAT774\\_ALERT\\_1\\_G](#) Check X-Y Bond in CIF: Fe2 --Fe3 .. 5.43 Ang.  
[PLAT774\\_ALERT\\_1\\_G](#) Check X-Y Bond in CIF: Fe3 --Fe3 .. 5.22 Ang.  
[PLAT794\\_ALERT\\_5\\_G](#) Tentative Bond Valency for Fe1 (III) . 3.24 Info

#### And 2 other PLAT794 Alerts

[PLAT794\\_ALERT\\_5\\_G](#) Tentative Bond Valency for Fe2 (III) . 3.23 Info  
[PLAT794\\_ALERT\\_5\\_G](#) Tentative Bond Valency for Fe3 (III) . 3.18 Info

[PLAT802\\_ALERT\\_4\\_G](#) CIF Input Record(s) with more than 80 Characters 1 Info  
[PLAT860\\_ALERT\\_3\\_G](#) Number of Least-Squares Restraints ..... 42 Note

|                         |                       |                   |                   |                                                  |     |              |
|-------------------------|-----------------------|-------------------|-------------------|--------------------------------------------------|-----|--------------|
| <a href="#">PLAT912</a> | <a href="#">ALERT</a> | <a href="#">4</a> | <a href="#">G</a> | Missing # of FCF Reflections Above STh/L= 0.600  | 29  | Note         |
| <a href="#">PLAT913</a> | <a href="#">ALERT</a> | <a href="#">3</a> | <a href="#">G</a> | Missing # of Very Strong Reflections in FCF .... | 1   | Note         |
| <a href="#">PLAT933</a> | <a href="#">ALERT</a> | <a href="#">2</a> | <a href="#">G</a> | Number of OMIT Records in Embedded .res File ... | 14  | Note         |
| <a href="#">PLAT941</a> | <a href="#">ALERT</a> | <a href="#">3</a> | <a href="#">G</a> | Average HKL Measurement Multiplicity .....       | 4.4 | Low          |
| <a href="#">PLAT965</a> | <a href="#">ALERT</a> | <a href="#">2</a> | <a href="#">G</a> | The SHELXL WEIGHT Optimisation has not Converged |     | Please Check |
| <a href="#">PLAT978</a> | <a href="#">ALERT</a> | <a href="#">2</a> | <a href="#">G</a> | Number C-C Bonds with Positive Residual Density. | 3   | Info         |

0 **ALERT level A** = Most likely a serious problem - resolve or explain  
 1 **ALERT level B** = A potentially serious problem, consider carefully  
 7 **ALERT level C** = Check. Ensure it is not caused by an omission or oversight  
 23 **ALERT level G** = General information/check it is not something unexpected

3 ALERT type 1 CIF construction/syntax error, inconsistent or missing data  
 12 ALERT type 2 Indicator that the structure model may be wrong or deficient  
 7 ALERT type 3 Indicator that the structure quality may be low  
 6 ALERT type 4 Improvement, methodology, query or suggestion  
 3 ALERT type 5 Informative message, check

It is advisable to attempt to resolve as many as possible of the alerts in all categories. Often the minor alerts point to easily fixed oversights, errors and omissions in your CIF or refinement strategy, so attention to these fine details can be worthwhile. In order to resolve some of the more serious problems it may be necessary to carry out additional measurements or structure refinements. However, the purpose of your study may justify the reported deviations and the more serious of these should normally be commented upon in the discussion or experimental section of a paper or in the "special\_details" fields of the CIF. checkCIF was carefully designed to identify outliers and unusual parameters, but every test has its limitations and alerts that are not important in a particular case may appear. Conversely, the absence of alerts does not guarantee there are no aspects of the results needing attention. It is up to the individual to critically assess their own results and, if necessary, seek expert advice.

### Publication of your CIF in IUCr journals

A basic structural check has been run on your CIF. These basic checks will be run on all CIFs submitted for publication in IUCr journals (*Acta Crystallographica*, *Journal of Applied Crystallography*, *Journal of Synchrotron Radiation*); however, if you intend to submit to *Acta Crystallographica Section C* or *E* or *IUCrData*, you should make sure that [full publication checks](#) are run on the final version of your CIF prior to submission.

### Publication of your CIF in other journals

Please refer to the *Notes for Authors* of the relevant journal for any special instructions relating to CIF submission.

---

PLATON version of 18/09/2020; check.def file version of 20/08/2020

**Datablock Fe4SCN\_2\_work4 - ellipsoid plot**

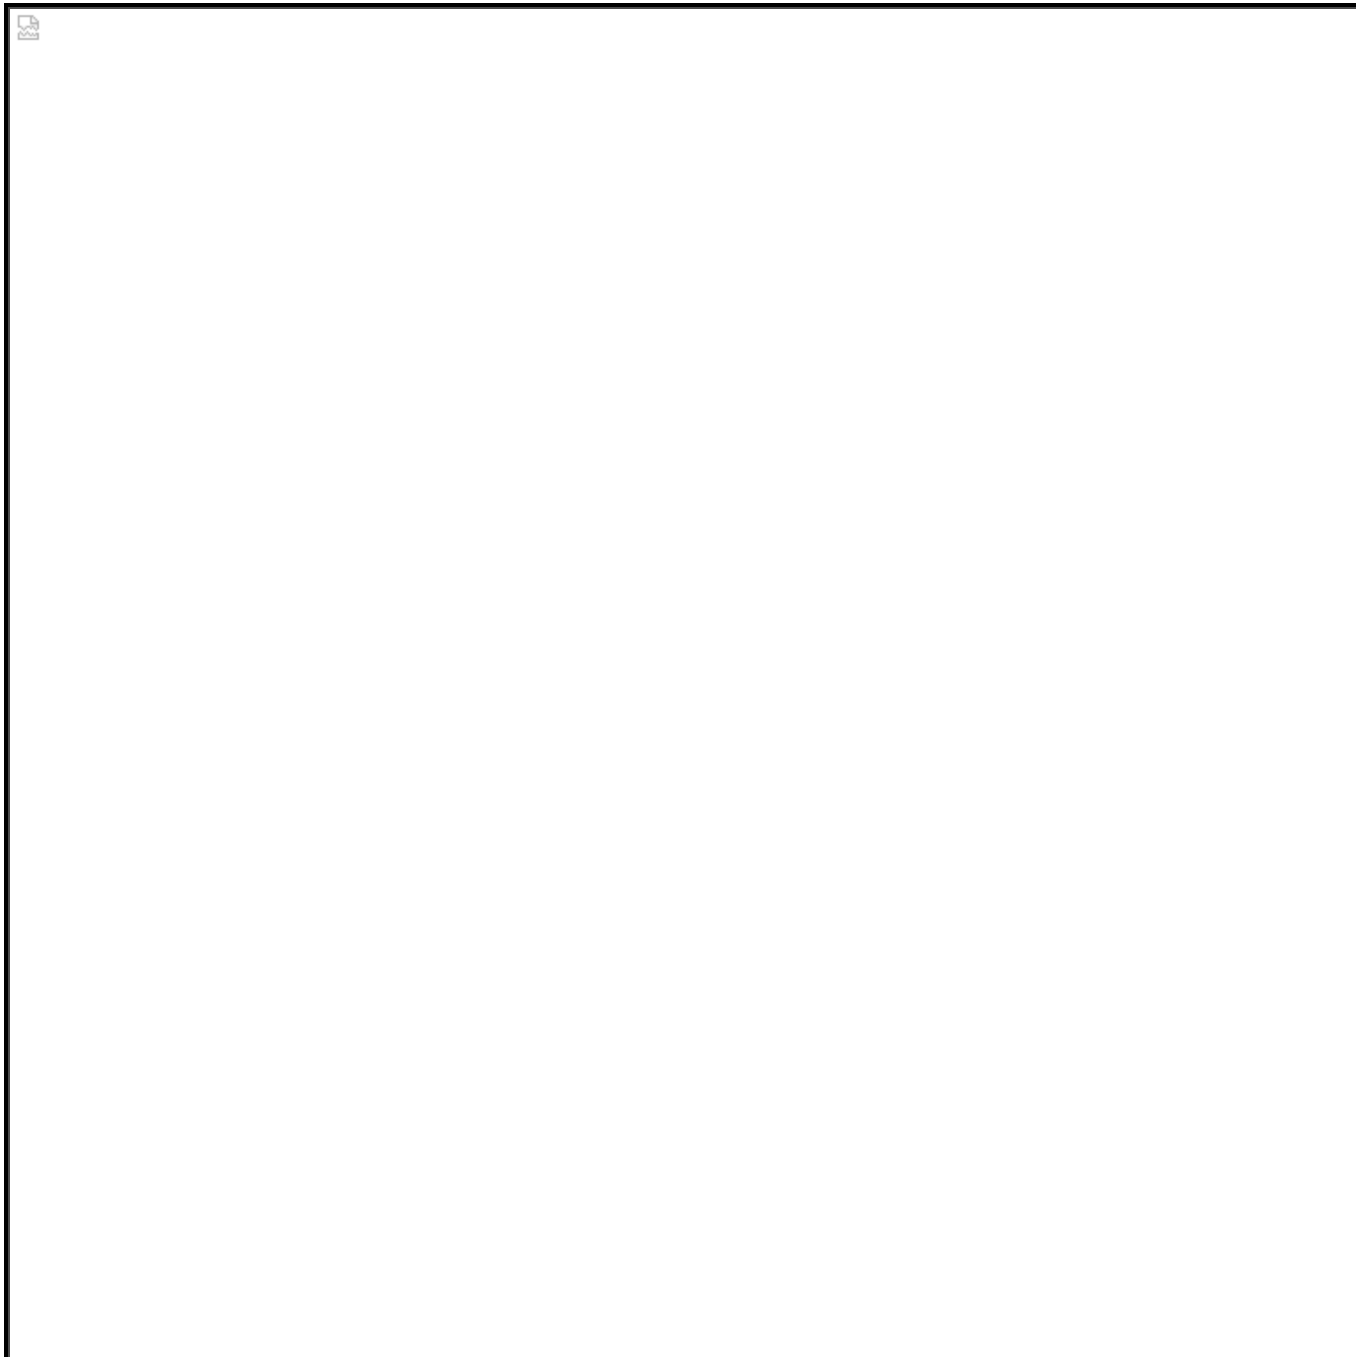

---

[Download CIF editor \(publCIF\) from the IUCr](#)  
[Download CIF editor \(enCIFer\) from the CCDC](#)  
[Test a new CIF entry](#)
