# Supplementary material
Source: MDPI journal article supplement (https://www.mdpi.com/2312-7481/6/4/55)
Supplement: s1 [file s1 › checkCIF_PLATON report_compound_2(0.375)Et2O.pdf]

No syntax errors found.  
Please wait while processing ....

[CIF dictionary](#)  
[Interpreting this report](#)

## Datablock: 160312ET\_1\_work6

---

|                 |                                                        |                    |
|-----------------|--------------------------------------------------------|--------------------|
| Bond precision: | C-C = 0.0069 Å                                         | Wavelength=0.71073 |
| Cell:           | a=15.8696(4)    b=19.5070(5)    c=32.5981(8)           |                    |
|                 | alpha=97.1881(12) beta=102.1501(12) gamma=104.3036(13) |                    |
| Temperature:    | 140 K                                                  |                    |

  

|                        | Calculated                           | Reported                             |
|------------------------|--------------------------------------|--------------------------------------|
| Volume                 | 9390.9(4)                            | 9390.9(4)                            |
| Space group            | P -1                                 | P-1                                  |
| Hall group             | -P 1                                 | -P 1                                 |
| Moiety formula         | C80 H136 Fe4 O20 S2, 0.375(C4 H10 O) | C80 H136 Fe4 O20 S2, (C4 H10 O)0.375 |
| Sum formula            | C81.50 H139.75 Fe4 O20.38 S2         | C81.50 H139.75 Fe4 O20.38 S2         |
| Mr                     | 1733.21                              | 1733.20                              |
| Dx, g cm <sup>-3</sup> | 1.226                                | 1.226                                |
| Z                      | 4                                    | 4                                    |
| Mu (mm <sup>-1</sup> ) | 0.712                                | 0.712                                |
| F000                   | 3711.0                               | 3711.0                               |
| F000'                  | 3719.02                              |                                      |
| h,k,lmax               | 20,24,41                             | 20,24,41                             |
| Nref                   | 41033                                | 39675                                |
| Tmin,Tmax              | 0.653,0.758                          | 0.663,0.769                          |
| Tmin'                  | 0.632                                |                                      |

Correction method= # Reported T Limits: Tmin=0.663  
Tmax=0.769 AbsCorr = MULTI-SCAN  
Data completeness= 0.967      Theta(max)= 27.010  
R(reflections)= 0.0602( 27095)      wR2(reflections)= 0.1754( 39675)  
S = 1.040      Npar= 2008

---

The following ALERTS were generated. Each ALERT has the format

**test-name\_ALERT\_alert-type\_alert-level.**

Click on the hyperlinks for more details of the test.

---

### ● Alert level B

[PLAT201\\_ALERT\\_2\\_B](#) Isotropic non-H Atoms in Main Residue(s) ..... 8 Report  
C175      C176      C177      C178      C47A      etc.

**Author Response: Isotropic refinement was used for disordered C atoms of tBu groups with SOF < 2/3 (C175,C176,C177,C178,C47A,C48A,C49A,C50A in the Main Residues) and for C and O atoms of minority thioacetyl components and of solvent molecules**

[PLAT242\\_ALERT\\_2\\_B](#) Low      'MainMol' Ueq as Compared to Neighbors of      C19 Check

**Author Response: Quaternary C atoms of tBu groups, whose methyl C atoms have much larger Ueq values due to rotational disorder**

[PLAT242\\_ALERT\\_2\\_B](#) Low      'MainMol' Ueq as Compared to Neighbors of      C43 Check

**Author Response: Quaternary C atoms of tBu groups, whose methyl C atoms have much larger Ueq values due to rotational disorder**

---

### ● Alert level C

[PLAT029\\_ALERT\\_3\\_C](#) \_diffn\_measured\_fraction\_theta\_full value Low . 0.967 Why?  
[PLAT213\\_ALERT\\_2\\_C](#) Atom C112      has ADP max/min Ratio ..... 3.3 prolat

**And 6 other PLAT213 Alerts**

|                                   |           |                       |       |     |        |
|-----------------------------------|-----------|-----------------------|-------|-----|--------|
| <a href="#">PLAT213_ALERT_2_C</a> | Atom C128 | has ADP max/min Ratio | ..... | 3.3 | prolat |
| <a href="#">PLAT213_ALERT_2_C</a> | Atom C133 | has ADP max/min Ratio | ..... | 3.5 | prolat |
| <a href="#">PLAT213_ALERT_2_C</a> | Atom C22  | has ADP max/min Ratio | ..... | 3.3 | prolat |
| <a href="#">PLAT213_ALERT_2_C</a> | Atom C44  | has ADP max/min Ratio | ..... | 3.2 | prolat |
| <a href="#">PLAT213_ALERT_2_C</a> | Atom C54  | has ADP max/min Ratio | ..... | 3.2 | prolat |
| <a href="#">PLAT213_ALERT_2_C</a> | Atom C60A | has ADP max/min Ratio | ..... | 3.2 | prolat |

[PLAT220\\_ALERT\\_2\\_C](#) NonSolvent      Resd 1      C      Ueq(max)/Ueq(min) Range      4.8 Ratio

**And 3 other PLAT220 Alerts**

|                                   |            |        |   |                         |           |
|-----------------------------------|------------|--------|---|-------------------------|-----------|
| <a href="#">PLAT220_ALERT_2_C</a> | NonSolvent | Resd 1 | O | Ueq(max)/Ueq(min) Range | 5.3 Ratio |
| <a href="#">PLAT220_ALERT_2_C</a> | NonSolvent | Resd 2 | C | Ueq(max)/Ueq(min) Range | 5.3 Ratio |

|                                   |            |           |   |                                 |       |      |       |
|-----------------------------------|------------|-----------|---|---------------------------------|-------|------|-------|
| <a href="#">PLAT220_ALERT_2_C</a> | NonSolvent | Resd 2    | O | Ueq(max)/Ueq(min)               | Range | 4.0  | Ratio |
| <a href="#">PLAT222_ALERT_3_C</a> | NonSolvent | Resd 1    | H | Uiso(max)/Uiso(min)             | Range | 5.2  | Ratio |
| <a href="#">PLAT222_ALERT_3_C</a> | NonSolvent | Resd 2    | H | Uiso(max)/Uiso(min)             | Range | 6.3  | Ratio |
| <a href="#">PLAT241_ALERT_2_C</a> | High       | 'MainMol' |   | Ueq as Compared to Neighbors of |       | 011  | Check |
| <b>And 2 other PLAT241 Alerts</b> |            |           |   |                                 |       |      |       |
| <a href="#">PLAT241_ALERT_2_C</a> | High       | 'MainMol' |   | Ueq as Compared to Neighbors of |       | C12  | Check |
| <a href="#">PLAT241_ALERT_2_C</a> | High       | 'MainMol' |   | Ueq as Compared to Neighbors of |       | C14  | Check |
| <a href="#">PLAT242_ALERT_2_C</a> | Low        | 'MainMol' |   | Ueq as Compared to Neighbors of |       | C103 | Check |

**Author Response: Quaternary C atoms of tBu groups, whose methyl C atoms have much larger Ueq values due to rotational disorder**

|                                   |     |           |  |                                 |  |      |       |
|-----------------------------------|-----|-----------|--|---------------------------------|--|------|-------|
| <a href="#">PLAT242_ALERT_2_C</a> | Low | 'MainMol' |  | Ueq as Compared to Neighbors of |  | C107 | Check |
|-----------------------------------|-----|-----------|--|---------------------------------|--|------|-------|

**Author Response: Quaternary C atoms of tBu groups, whose methyl C atoms have much larger Ueq values due to rotational disorder**

|                                   |     |           |  |                                 |  |      |       |
|-----------------------------------|-----|-----------|--|---------------------------------|--|------|-------|
| <a href="#">PLAT242_ALERT_2_C</a> | Low | 'MainMol' |  | Ueq as Compared to Neighbors of |  | C111 | Check |
|-----------------------------------|-----|-----------|--|---------------------------------|--|------|-------|

**Author Response: Quaternary C atoms of tBu groups, whose methyl C atoms have much larger Ueq values due to rotational disorder**

|                                   |     |           |  |                                 |  |      |       |
|-----------------------------------|-----|-----------|--|---------------------------------|--|------|-------|
| <a href="#">PLAT242_ALERT_2_C</a> | Low | 'MainMol' |  | Ueq as Compared to Neighbors of |  | C127 | Check |
|-----------------------------------|-----|-----------|--|---------------------------------|--|------|-------|

**Author Response: Quaternary C atoms of tBu groups, whose methyl C atoms have much larger Ueq values due to rotational disorder**

|                                   |     |           |  |                                 |  |      |       |
|-----------------------------------|-----|-----------|--|---------------------------------|--|------|-------|
| <a href="#">PLAT242_ALERT_2_C</a> | Low | 'MainMol' |  | Ueq as Compared to Neighbors of |  | C131 | Check |
|-----------------------------------|-----|-----------|--|---------------------------------|--|------|-------|

**Author Response: Quaternary C atoms of tBu groups, whose methyl C atoms have much larger Ueq values due to rotational disorder**

|                                   |     |           |  |                                 |  |      |       |
|-----------------------------------|-----|-----------|--|---------------------------------|--|------|-------|
| <a href="#">PLAT242_ALERT_2_C</a> | Low | 'MainMol' |  | Ueq as Compared to Neighbors of |  | C143 | Check |
|-----------------------------------|-----|-----------|--|---------------------------------|--|------|-------|

**Author Response: Quaternary C atoms of tBu groups, whose methyl C atoms have much larger Ueq values due to rotational disorder**

|                                   |     |           |  |                                 |  |     |       |
|-----------------------------------|-----|-----------|--|---------------------------------|--|-----|-------|
| <a href="#">PLAT242_ALERT_2_C</a> | Low | 'MainMol' |  | Ueq as Compared to Neighbors of |  | C23 | Check |
|-----------------------------------|-----|-----------|--|---------------------------------|--|-----|-------|

**Author Response: Quaternary C atoms of tBu groups, whose methyl C atoms have much larger Ueq values due to rotational disorder**

|                                   |     |           |  |                                 |  |     |       |
|-----------------------------------|-----|-----------|--|---------------------------------|--|-----|-------|
| <a href="#">PLAT242_ALERT_2_C</a> | Low | 'MainMol' |  | Ueq as Compared to Neighbors of |  | C27 | Check |
|-----------------------------------|-----|-----------|--|---------------------------------|--|-----|-------|

**Author Response: Quaternary C atoms of tBu groups, whose methyl C atoms have much larger Ueq values due to rotational disorder**

|                                   |     |           |  |                                 |  |     |       |
|-----------------------------------|-----|-----------|--|---------------------------------|--|-----|-------|
| <a href="#">PLAT242_ALERT_2_C</a> | Low | 'MainMol' |  | Ueq as Compared to Neighbors of |  | C35 | Check |
|-----------------------------------|-----|-----------|--|---------------------------------|--|-----|-------|

**Author Response: Quaternary C atoms of tBu groups, whose methyl C atoms have much larger Ueq values due to rotational disorder**

|                                   |     |           |  |                                 |  |     |       |
|-----------------------------------|-----|-----------|--|---------------------------------|--|-----|-------|
| <a href="#">PLAT242_ALERT_2_C</a> | Low | 'MainMol' |  | Ueq as Compared to Neighbors of |  | C51 | Check |
|-----------------------------------|-----|-----------|--|---------------------------------|--|-----|-------|

**Author Response: Quaternary C atoms of tBu groups, whose methyl C atoms have much larger Ueq values due to rotational disorder**

|                                   |     |           |  |                                 |  |     |       |
|-----------------------------------|-----|-----------|--|---------------------------------|--|-----|-------|
| <a href="#">PLAT242_ALERT_2_C</a> | Low | 'MainMol' |  | Ueq as Compared to Neighbors of |  | C55 | Check |
|-----------------------------------|-----|-----------|--|---------------------------------|--|-----|-------|

**Author Response: Quaternary C atoms of tBu groups, whose methyl C atoms have much larger Ueq values due to rotational disorder**

|                                   |     |           |  |                                 |  |     |       |
|-----------------------------------|-----|-----------|--|---------------------------------|--|-----|-------|
| <a href="#">PLAT242_ALERT_2_C</a> | Low | 'MainMol' |  | Ueq as Compared to Neighbors of |  | C72 | Check |
|-----------------------------------|-----|-----------|--|---------------------------------|--|-----|-------|

**Author Response: Quaternary C atoms of tBu groups, whose methyl C atoms have much larger Ueq values due to rotational disorder**

|                                   |     |                                   |  |         |      |  |  |
|-----------------------------------|-----|-----------------------------------|--|---------|------|--|--|
| <a href="#">PLAT341_ALERT_3_C</a> | Low | Bond Precision on C-C Bonds ..... |  | 0.00689 | Ang. |  |  |
|-----------------------------------|-----|-----------------------------------|--|---------|------|--|--|

**Alert level G**

|                         |                         |                   |                                                  |              |        |
|-------------------------|-------------------------|-------------------|--------------------------------------------------|--------------|--------|
| <a href="#">PLAT002</a> | <a href="#">ALERT 2</a> | <a href="#">G</a> | Number of Distance or Angle Restraints on AtSite | 71           | Note   |
| <a href="#">PLAT003</a> | <a href="#">ALERT 2</a> | <a href="#">G</a> | Number of Uiso or Uij Restrained non-H Atoms ... | 19           | Report |
| <a href="#">PLAT005</a> | <a href="#">ALERT 5</a> | <a href="#">G</a> | No Embedded Refinement Details Found in the CIF  | Please Do !  |        |
| <a href="#">PLAT042</a> | <a href="#">ALERT 1</a> | <a href="#">G</a> | Calc. and Reported MoietyFormula Strings Differ  | Please Check |        |
| <a href="#">PLAT063</a> | <a href="#">ALERT 4</a> | <a href="#">G</a> | Crystal Size Possibly too Large for Beam Size .. | 0.63         | mm     |
| <a href="#">PLAT083</a> | <a href="#">ALERT 2</a> | <a href="#">G</a> | SHELXL Second Parameter in WGHT Unusually Large  | 19.70        | Why ?  |
| <a href="#">PLAT300</a> | <a href="#">ALERT 4</a> | <a href="#">G</a> | Atom Site Occupancy of S7 Constrained at         | 0.25         | Check  |

**And 9 other PLAT300 Alerts**

|                         |                         |                   |                             |                |      |       |
|-------------------------|-------------------------|-------------------|-----------------------------|----------------|------|-------|
| <a href="#">PLAT300</a> | <a href="#">ALERT 4</a> | <a href="#">G</a> | Atom Site Occupancy of O43  | Constrained at | 0.25 | Check |
| <a href="#">PLAT300</a> | <a href="#">ALERT 4</a> | <a href="#">G</a> | Atom Site Occupancy of C165 | Constrained at | 0.25 | Check |
| <a href="#">PLAT300</a> | <a href="#">ALERT 4</a> | <a href="#">G</a> | Atom Site Occupancy of C166 | Constrained at | 0.25 | Check |
| <a href="#">PLAT300</a> | <a href="#">ALERT 4</a> | <a href="#">G</a> | Atom Site Occupancy of C181 | Constrained at | 0.25 | Check |
| <a href="#">PLAT300</a> | <a href="#">ALERT 4</a> | <a href="#">G</a> | Atom Site Occupancy of H160 | Constrained at | 0.25 | Check |
| <a href="#">PLAT300</a> | <a href="#">ALERT 4</a> | <a href="#">G</a> | Atom Site Occupancy of H16P | Constrained at | 0.25 | Check |
| <a href="#">PLAT300</a> | <a href="#">ALERT 4</a> | <a href="#">G</a> | Atom Site Occupancy of H16Q | Constrained at | 0.25 | Check |
| <a href="#">PLAT300</a> | <a href="#">ALERT 4</a> | <a href="#">G</a> | Atom Site Occupancy of H18C | Constrained at | 0.25 | Check |
| <a href="#">PLAT300</a> | <a href="#">ALERT 4</a> | <a href="#">G</a> | Atom Site Occupancy of H18D | Constrained at | 0.25 | Check |

|                         |                         |                   |                                                  |      |       |
|-------------------------|-------------------------|-------------------|--------------------------------------------------|------|-------|
| <a href="#">PLAT301</a> | <a href="#">ALERT 3</a> | <a href="#">G</a> | Main Residue Disorder .....(Resd 1 )             | 17%  | Note  |
| <a href="#">PLAT301</a> | <a href="#">ALERT 3</a> | <a href="#">G</a> | Main Residue Disorder .....(Resd 2 )             | 11%  | Note  |
| <a href="#">PLAT302</a> | <a href="#">ALERT 4</a> | <a href="#">G</a> | Anion/Solvent/Minor-Residue Disorder (Resd 3 )   | 100% | Note  |
| <a href="#">PLAT302</a> | <a href="#">ALERT 4</a> | <a href="#">G</a> | Anion/Solvent/Minor-Residue Disorder (Resd 4 )   | 100% | Note  |
| <a href="#">PLAT304</a> | <a href="#">ALERT 4</a> | <a href="#">G</a> | Non-Integer Number of Atoms in ..... (Resd 3 )   | 6.55 | Check |
| <a href="#">PLAT304</a> | <a href="#">ALERT 4</a> | <a href="#">G</a> | Non-Integer Number of Atoms in ..... (Resd 4 )   | 4.70 | Check |
| <a href="#">PLAT380</a> | <a href="#">ALERT 4</a> | <a href="#">G</a> | Incorrectly? Oriented X(sp2)-Methyl Moiety ..... | C73  | Check |
| <a href="#">PLAT380</a> | <a href="#">ALERT 4</a> | <a href="#">G</a> | Incorrectly? Oriented X(sp2)-Methyl Moiety ..... | C80  | Check |
| <a href="#">PLAT412</a> | <a href="#">ALERT 2</a> | <a href="#">G</a> | Short Intra XH3 .. XHn H12J ..H91 .              | 1.94 | Ang.  |

|                         |                         |                   |                            |          |       |       |
|-------------------------|-------------------------|-------------------|----------------------------|----------|-------|-------|
| <a href="#">PLAT412</a> | <a href="#">ALERT 2</a> | <a href="#">G</a> | Short Intra XH3 .. XHn H88 | x,y,z =  | 1_555 | Check |
|                         |                         |                   |                            | ..H12D . | 1.93  | Ang.  |

|                         |                         |                   |                            |          |       |       |
|-------------------------|-------------------------|-------------------|----------------------------|----------|-------|-------|
| <a href="#">PLAT412</a> | <a href="#">ALERT 2</a> | <a href="#">G</a> | Short Intra XH3 .. XHn H91 | x,y,z =  | 1_555 | Check |
|                         |                         |                   |                            | ..H16D . | 2.06  | Ang.  |

|                         |                         |                   |                            |          |       |       |
|-------------------------|-------------------------|-------------------|----------------------------|----------|-------|-------|
| <a href="#">PLAT412</a> | <a href="#">ALERT 2</a> | <a href="#">G</a> | Short Intra XH3 .. XHn H17 | x,y,z =  | 1_555 | Check |
|                         |                         |                   |                            | ..H62A . | 2.03  | Ang.  |

|                         |                         |                   |                             |          |       |       |
|-------------------------|-------------------------|-------------------|-----------------------------|----------|-------|-------|
| <a href="#">PLAT413</a> | <a href="#">ALERT 2</a> | <a href="#">G</a> | Short Inter XH3 .. XHn H12U | x,y,z =  | 1_555 | Check |
|                         |                         |                   |                             | ..H16N . | 2.13  | Ang.  |

|                         |                         |                   |                             |              |       |       |
|-------------------------|-------------------------|-------------------|-----------------------------|--------------|-------|-------|
| <a href="#">PLAT413</a> | <a href="#">ALERT 2</a> | <a href="#">G</a> | Short Inter XH3 .. XHn H13J | 1-x,-y,1-z = | 2_656 | Check |
|                         |                         |                   |                             | ..H15F .     | 1.86  | Ang.  |

|                         |                         |                   |                        |               |       |       |
|-------------------------|-------------------------|-------------------|------------------------|---------------|-------|-------|
| <a href="#">PLAT413</a> | <a href="#">ALERT 2</a> | <a href="#">G</a> | Short Inter XH3 .. XHn | 1-x,1-y,1-z = | 2_666 | Check |
|                         |                         |                   |                        |               |       |       |

|                         |                         |                   |                                             |      |      |
|-------------------------|-------------------------|-------------------|---------------------------------------------|------|------|
| <a href="#">PLAT720</a> | <a href="#">ALERT 4</a> | <a href="#">G</a> | Number of Unusual/Non-Standard Labels ..... | 34   | Note |
| <a href="#">PLAT774</a> | <a href="#">ALERT 1</a> | <a href="#">G</a> | Check X-Y Bond in CIF: Fe2 --Fe3 ..         | 5.36 | Ang. |

**And 5 other PLAT774 Alerts**

|                         |                         |                   |                                     |      |      |
|-------------------------|-------------------------|-------------------|-------------------------------------|------|------|
| <a href="#">PLAT774</a> | <a href="#">ALERT 1</a> | <a href="#">G</a> | Check X-Y Bond in CIF: Fe2 --Fe4 .. | 5.35 | Ang. |
| <a href="#">PLAT774</a> | <a href="#">ALERT 1</a> | <a href="#">G</a> | Check X-Y Bond in CIF: Fe3 --Fe4 .. | 5.35 | Ang. |
| <a href="#">PLAT774</a> | <a href="#">ALERT 1</a> | <a href="#">G</a> | Check X-Y Bond in CIF: Fe6 --Fe7 .. | 5.40 | Ang. |
| <a href="#">PLAT774</a> | <a href="#">ALERT 1</a> | <a href="#">G</a> | Check X-Y Bond in CIF: Fe6 --Fe8 .. | 5.44 | Ang. |
| <a href="#">PLAT774</a> | <a href="#">ALERT 1</a> | <a href="#">G</a> | Check X-Y Bond in CIF: Fe7 --Fe8 .. | 5.27 | Ang. |

|                         |                         |                   |                                                  |       |       |
|-------------------------|-------------------------|-------------------|--------------------------------------------------|-------|-------|
| <a href="#">PLAT779</a> | <a href="#">ALERT 4</a> | <a href="#">G</a> | Suspect or Irrelevant (Bond) Angle(s) in CIF . # | 282   | Check |
|                         |                         |                   | C47A -C12 -C47B 1.555 1.555 1.555                | 32.20 | Deg.  |

|                         |                         |                   |                                                  |       |       |
|-------------------------|-------------------------|-------------------|--------------------------------------------------|-------|-------|
| <a href="#">PLAT779</a> | <a href="#">ALERT 4</a> | <a href="#">G</a> | Suspect or Irrelevant (Bond) Angle(s) in CIF . # | 773   | Check |
|                         |                         |                   | C119 -C89 -C175 1.555 1.555 1.555                | 18.50 | Deg.  |

|                         |                         |                   |                                                  |       |       |
|-------------------------|-------------------------|-------------------|--------------------------------------------------|-------|-------|
| <a href="#">PLAT779</a> | <a href="#">ALERT 4</a> | <a href="#">G</a> | Suspect or Irrelevant (Bond) Angle(s) in CIF . # | 851   | Check |
|                         |                         |                   | C167 -C90 -C123 1.555 1.555 1.555                | 23.70 | Deg.  |

|                         |                         |                   |                                                 |   |      |
|-------------------------|-------------------------|-------------------|-------------------------------------------------|---|------|
| <a href="#">PLAT790</a> | <a href="#">ALERT 4</a> | <a href="#">G</a> | Centre of Gravity not Within Unit Cell: Resd. # | 3 | Note |
|                         |                         |                   | C4 H10 O                                        |   |      |

|                         |                         |                   |                                                 |   |      |
|-------------------------|-------------------------|-------------------|-------------------------------------------------|---|------|
| <a href="#">PLAT790</a> | <a href="#">ALERT 4</a> | <a href="#">G</a> | Centre of Gravity not Within Unit Cell: Resd. # | 4 | Note |
|                         |                         |                   | C4 H10 O                                        |   |      |

|                         |                         |                   |                                        |      |      |
|-------------------------|-------------------------|-------------------|----------------------------------------|------|------|
| <a href="#">PLAT794</a> | <a href="#">ALERT 5</a> | <a href="#">G</a> | Tentative Bond Valency for Fe1 (III) . | 3.25 | Info |
|-------------------------|-------------------------|-------------------|----------------------------------------|------|------|

**And 7 other PLAT794 Alerts**

|                         |                         |                   |                                        |      |      |
|-------------------------|-------------------------|-------------------|----------------------------------------|------|------|
| <a href="#">PLAT794</a> | <a href="#">ALERT 5</a> | <a href="#">G</a> | Tentative Bond Valency for Fe2 (III) . | 3.16 | Info |
|-------------------------|-------------------------|-------------------|----------------------------------------|------|------|

|                         |                         |                   |                                        |      |      |
|-------------------------|-------------------------|-------------------|----------------------------------------|------|------|
| <a href="#">PLAT794</a> | <a href="#">ALERT 5</a> | <a href="#">G</a> | Tentative Bond Valency for Fe3 (III) . | 3.18 | Info |
|-------------------------|-------------------------|-------------------|----------------------------------------|------|------|

|                         |                         |                   |                                        |      |      |
|-------------------------|-------------------------|-------------------|----------------------------------------|------|------|
| <a href="#">PLAT794</a> | <a href="#">ALERT 5</a> | <a href="#">G</a> | Tentative Bond Valency for Fe4 (III) . | 3.16 | Info |
|-------------------------|-------------------------|-------------------|----------------------------------------|------|------|

|                         |                         |                   |                                        |      |      |
|-------------------------|-------------------------|-------------------|----------------------------------------|------|------|
| <a href="#">PLAT794</a> | <a href="#">ALERT 5</a> | <a href="#">G</a> | Tentative Bond Valency for Fe5 (III) . | 3.25 | Info |
|-------------------------|-------------------------|-------------------|----------------------------------------|------|------|

|                         |                         |                   |                                        |      |      |
|-------------------------|-------------------------|-------------------|----------------------------------------|------|------|
| <a href="#">PLAT794</a> | <a href="#">ALERT 5</a> | <a href="#">G</a> | Tentative Bond Valency for Fe6 (III) . | 3.15 | Info |
|-------------------------|-------------------------|-------------------|----------------------------------------|------|------|

|                         |                         |                   |                                        |      |      |
|-------------------------|-------------------------|-------------------|----------------------------------------|------|------|
| <a href="#">PLAT794</a> | <a href="#">ALERT 5</a> | <a href="#">G</a> | Tentative Bond Valency for Fe7 (III) . | 3.16 | Info |
|-------------------------|-------------------------|-------------------|----------------------------------------|------|------|

|                         |                         |                   |                                        |      |      |
|-------------------------|-------------------------|-------------------|----------------------------------------|------|------|
| <a href="#">PLAT794</a> | <a href="#">ALERT 5</a> | <a href="#">G</a> | Tentative Bond Valency for Fe8 (III) . | 3.17 | Info |
|-------------------------|-------------------------|-------------------|----------------------------------------|------|------|

|                         |                         |                   |                                          |     |      |
|-------------------------|-------------------------|-------------------|------------------------------------------|-----|------|
| <a href="#">PLAT860</a> | <a href="#">ALERT 3</a> | <a href="#">G</a> | Number of Least-Squares Restraints ..... | 365 | Note |
|-------------------------|-------------------------|-------------------|------------------------------------------|-----|------|

|                         |                         |                   |                                                 |      |      |
|-------------------------|-------------------------|-------------------|-------------------------------------------------|------|------|
| <a href="#">PLAT899</a> | <a href="#">ALERT 4</a> | <a href="#">G</a> | SHELXL97 is Deprecated and Succeeded by SHELXL/ | 2018 | Note |
|-------------------------|-------------------------|-------------------|-------------------------------------------------|------|------|

- 0 **ALERT level A** = Most likely a serious problem - resolve or explain  
 3 **ALERT level B** = A potentially serious problem, consider carefully  
 30 **ALERT level C** = Check. Ensure it is not caused by an omission or oversight  
 52 **ALERT level G** = General information/check it is not something unexpected

- 7 ALERT type 1 CIF construction/syntax error, inconsistent or missing data  
 38 ALERT type 2 Indicator that the structure model may be wrong or deficient  
 7 ALERT type 3 Indicator that the structure quality may be low  
 24 ALERT type 4 Improvement, methodology, query or suggestion

9 ALERT type 5 Informative message, check

---

It is advisable to attempt to resolve as many as possible of the alerts in all categories. Often the minor alerts point to easily fixed oversights, errors and omissions in your CIF or refinement strategy, so attention to these fine details can be worthwhile. In order to resolve some of the more serious problems it may be necessary to carry out additional measurements or structure refinements. However, the purpose of your study may justify the reported deviations and the more serious of these should normally be commented upon in the discussion or experimental section of a paper or in the "special\_details" fields of the CIF. checkCIF was carefully designed to identify outliers and unusual parameters, but every test has its limitations and alerts that are not important in a particular case may appear. Conversely, the absence of alerts does not guarantee there are no aspects of the results needing attention. It is up to the individual to critically assess their own results and, if necessary, seek expert advice.

### **Publication of your CIF in IUCr journals**

A basic structural check has been run on your CIF. These basic checks will be run on all CIFs submitted for publication in IUCr journals (*Acta Crystallographica*, *Journal of Applied Crystallography*, *Journal of Synchrotron Radiation*); however, if you intend to submit to *Acta Crystallographica Section C* or *E* or *IUCrData*, you should make sure that [full publication checks](#) are run on the final version of your CIF prior to submission.

### **Publication of your CIF in other journals**

Please refer to the *Notes for Authors* of the relevant journal for any special instructions relating to CIF submission.

---

PLATON version of 18/09/2020; check.def file version of 20/08/2020

**Datablock 160312ET\_1\_work6 - ellipsoid plot**

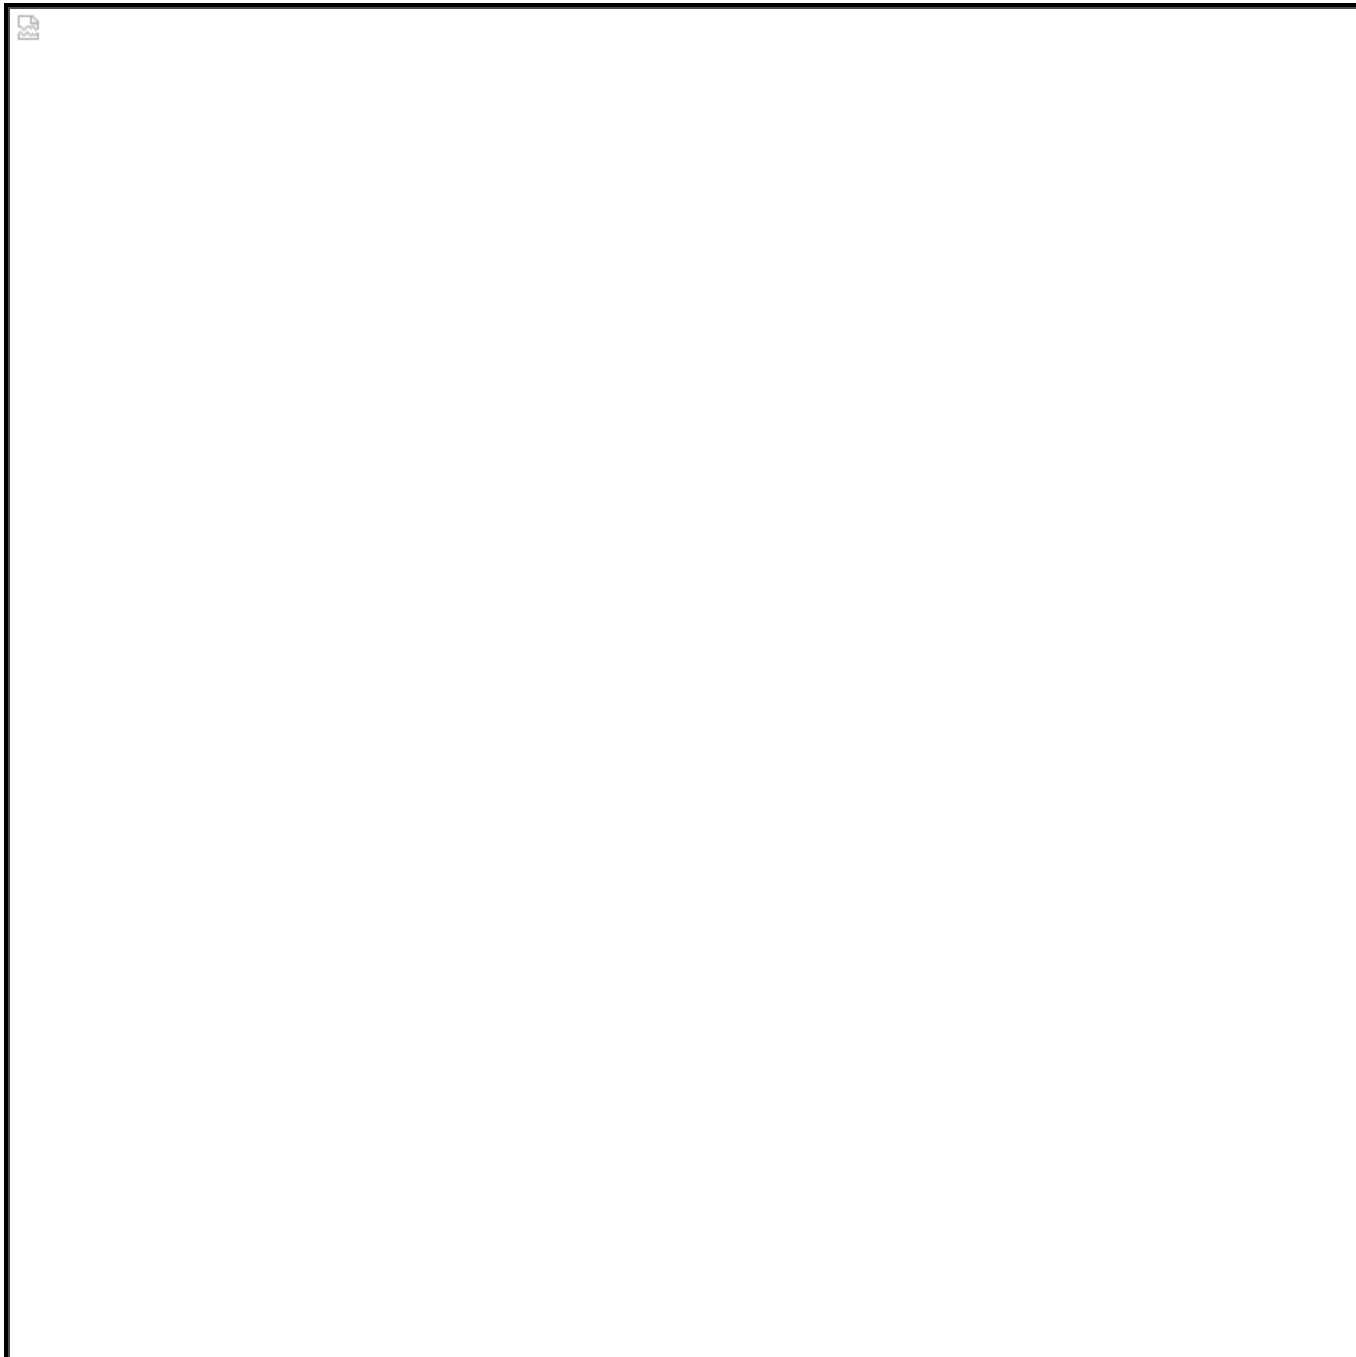

---

[Download CIF editor \(publCIF\) from the IUCr](#)  
[Download CIF editor \(enCIFer\) from the CCDC](#)  
[Test a new CIF entry](#)
